# Supplementary material
Source: publisher figshare collection journal article supplement (https://diabetesjournals.figshare.com/ndownloader/files/27536564)
Supplement: Supplementary file 1 [file 27536564]

**SUPPLEMENTAL FIGURE S2.** Control chart of CGM use at seven pediatric sites.

|  | Sep  18 | Oct  18 | Nov  18 | Dec  18 | Jan  19 | Feb  19 | Mar19 | Apr  19 | May 19 | Jun  19 | Jul  19 | Aug  19 | Sep  19 | Oct  19 | Nov  19 | Dec  19 | Jan  20 | Feb  20 |
| --- | --- | --- | --- | --- | --- | --- | --- | --- | --- | --- | --- | --- | --- | --- | --- | --- | --- | --- |
| Dem | 178 | 202 | 169 | 198 | 192 | 192 | 209 | 200 | 219 | 137 | 177 | 193 | 186 | 204 | 192 | 148 | 202 | 172 |
| Num | 57 | 60 | 59 | 86 | 82 | 87 | 101 | 105 | 118 | 75 | 99 | 110 | 113 | 123 | 114 | 93 | 125 | 108 |

|  | Mar 18 | Ju  18 | Jul  18 | Aug  18 | Sep  18 | Oct  18 | Nov  18 | Dec  18 | Jan  19 | Feb  19 | Mar19 | Apr  19 | Ma19 | Ju  19 | Jul  19 | Aug  19 | Sep  19 | Oct  19 | Nov  19 | Dec  19 | Jan  20 | Feb  20 | Mar  20 |
| --- | --- | --- | --- | --- | --- | --- | --- | --- | --- | --- | --- | --- | --- | --- | --- | --- | --- | --- | --- | --- | --- | --- | --- |
| Dem | 539 | 497 | 366 | 639 | 426 | 445 | 509 | 463 | 532 | 436 | 438 | 553 | 530 | 499 | 443 | 573 | 469 | 414 | 401 | 393 | 433 | 375 | 260 |
| Num | 208 | 187 | 158 | 248 | 181 | 185 | 234 | 222 | 265 | 203 | 221 | 272 | 293 | 275 | 224 | 327 | 276 | 227 | 250 | 238 | 264 | 228 | 154 |

|  | May-18 | Jun-18 | Jul-18 | Aug-18 | Sep-18 | Oct-18 | Nov-18 | Dec-18 | Jan-19 | Feb-19 | Mar-19 | Apr-19 | May-19 | Jun-19 | Jul-19 | Aug-19 | Sep-19 | Oct-19 | Nov-19 | Dec-19 | Jan-20 | Feb-20 |
| --- | --- | --- | --- | --- | --- | --- | --- | --- | --- | --- | --- | --- | --- | --- | --- | --- | --- | --- | --- | --- | --- | --- |
| Dem | 288 | 266 | 179 | 329 | 250 | 266 | *250* | 219 | 278 | 265 | 229 | 249 | 279 | 241 | 227 | 309 | 325 | 356 | 272 | 299 | 368 | 336 |
| Num | 107 | 89 | 69 | 118 | 102 | 90 | 105 | 99 | 128 | 120 | 100 | 118 | 126 | 89 | 114 | 131 | 62 | 141 | 128 | 92 | 172 | 157 |

|  | May 18 | Jun  18 | Jul  18 | Aug  18 | Sep  18 | Oct  18 | Nov  18 | Dec  18 | Jan  19 | Feb  19 | Mar19 | Apr  19 | May 19 | Jun  19 | Jul  19 | Aug  19 | Sep  19 | Oct  19 | Nov  19 | Dec  19 | Jan 20 | Feb 20 | Mar 20 |
| --- | --- | --- | --- | --- | --- | --- | --- | --- | --- | --- | --- | --- | --- | --- | --- | --- | --- | --- | --- | --- | --- | --- | --- |
| Dem | 342 | 343 | 296 | 376 | 268 | 342 | 298 | 353 | 366 | 292 | 338 | 356 | 349 | 310 | 343 | 341 | 326 | 327 | 232 | 337 | 328 | 333 | 215 |
| Num | 39 | 53 | 82 | 104 | 85 | 136 | 129 | 155 | 167 | 156 | 172 | 187 | 184 | 179 | 192 | 190 | 182 | 179 | 145 | 210 | 187 | 246 | 154 |

|  | May 18 | Jun  18 | Jul  18 | Aug  18 | Sep  18 | Oct  18 | Nov  18 | Dec  18 | Jan  19 | Feb  19 | Mar19 | Apr  19 | May 19 | Jun  19 | Jul  19 | Aug  19 | Sep  19 | Oct  19 | Nov  19 | Dec  19 |
| --- | --- | --- | --- | --- | --- | --- | --- | --- | --- | --- | --- | --- | --- | --- | --- | --- | --- | --- | --- | --- |
| Dem | 140 | 156 | 161 | 187 | 119 | 120 | 158 | 128 | 162 | 131 | 174 | 121 | 143 | 171 | 121 | 112 | 129 | 98 | 100 | 118 |
| Num | 9 | 22 | 34 | 49 | 33 | 37 | 47 | 47 | 57 | 61 | 78 | 54 | 78 | 97 | 55 | 60 | 65 | 43 | 51 | 69 |

|  | May 18 | Jun  18 | Jul  18 | Aug  18 | Sep  18 | Oct  18 | Nov  18 | Dec  18 | Jan  19 | Feb  19 | Mar19 | Apr  19 | May 19 | Jun  19 | Jul  19 | Aug  19 | Sep  19 | Oct  19 | Nov  19 | Dec  19 | Jan 20 | Feb  20 |
| --- | --- | --- | --- | --- | --- | --- | --- | --- | --- | --- | --- | --- | --- | --- | --- | --- | --- | --- | --- | --- | --- | --- |
| Dem | 281 | 223 | 264 | 305 | 267 | 309 | 280 | 267 | 338 | 311 | 262 | 277 | 274 | 262 | 320 | 319 | 293 | 339 | 283 | 249 | 320 | 351 |
| Num | 68 | 72 | 63 | 87 | 90 | 80 | 77 | 106 | 116 | 85 | 90 | 110 | 91 | 88 | 101 | 123 | 111 | 130 | 113 | 99 | 140 | 157 |

**No Change**

|  | May-18 | Jun-18 | Jul-18 | Aug-18 | Sep-18 | Oct-18 | Nov-18 | Dec-18 | Jan-19 | Feb-19 | Mar-19 | Apr-19 | May-19 | Jun-19 | Jul-19 | Aug-19 | Sep-19 | Oct-19 | Nov-19 | Dec-19 | Jan-20 | Feb-20 | Mar-20 |
| --- | --- | --- | --- | --- | --- | --- | --- | --- | --- | --- | --- | --- | --- | --- | --- | --- | --- | --- | --- | --- | --- | --- | --- |
| Dem | 257 | 266 | 201 | 280 | 236 | 280 | 228 | 187 | 242 | 252 | 253 | 243 | 298 | 222 | 264 | 273 | 262 | 267 | 236 | 236 | 291 | 240 | 137 |
| Num | 177 | 156 | 133 | 193 | 138 | 168 | 161 | 124 | 147 | 160 | 180 | 148 | 207 | 152 | 175 | 196 | 176 | 176 | 170 | 182 | 200 | 168 | 98 |
